# Supplementary material for: Assessing long-term QALYs gain from averting and reversing overweight and obesity in childhood
Source: Springer Nature journal article supplement (doi:10.1007/s11136-016-1285-7), 2016-04-06
Supplement: MOESM1 [file 10682936]

**Appendix 1: Transitional probabilities of becoming obese (BMI≥30), overweight (BMI 25- <30), and having BMI<25 at age 35, with respect to the childhood BMI-for-age percentile in males**

| **Age(yr)**  **in males** | **BMI percentile in childhood** | | | | | | | | |
| --- | --- | --- | --- | --- | --- | --- | --- | --- | --- |
| *<85th* | | | *85th-94th* | | | *≥95th* | | |
| **BMI at age 35** | | | | | | | | |
| *<25* | *25- <30* | ≥*30* | *<25* | *25- <30* | ≥*30* | *<25* | *25- <30* | ≥*30* |
| **3** | 0.47 | 0.43 | 0.1 | 0.41 | 0.47 | 0.12 | 0.29 | 0.56 | 0.15 |
| **4** | 0.52 | 0.38 | 0.1 | 0.47 | 0.42 | 0.11 | 0.38 | 0.48 | 0.14 |
| **5** | 0.49 | 0.36 | 0.15 | 0.41 | 0.4 | 0.19 | 0.28 | 0.41 | 0.31 |
| **6** | 0.49 | 0.37 | 0.14 | 0.43 | 0.41 | 0.16 | 0.31 | 0.46 | 0.23 |
| **7** | 0.46 | 0.4 | 0.14 | 0.34 | 0.47 | 0.19 | 0.14 | 0.48 | 0.38 |
| **8** | 0.51 | 0.37 | 0.12 | 0.43 | 0.43 | 0.14 | 0.28 | 0.5 | 0.22 |
| **9** | 0.43 | 0.43 | 0.14 | 0.32 | 0.51 | 0.17 | 0.14 | 0.56 | 0.3 |
| **10** | 0.49 | 0.4 | 0.11 | 0.39 | 0.44 | 0.17 | 0.19 | 0.44 | 0.37 |
| **11** | 0.47 | 0.41 | 0.12 | 0.36 | 0.48 | 0.16 | 0.16 | 0.56 | 0.28 |
| **12** | 0.47 | 0.41 | 0.12 | 0.37 | 0.45 | 0.18 | 0.18 | 0.44 | 0.38 |
| **13** | 0.42 | 0.43 | 0.15 | 0.29 | 0.49 | 0.22 | 0.09 | 0.45 | 0.46 |
| **14** | 0.41 | 0.47 | 0.12 | 0.27 | 0.55 | 0.18 | 0.09 | 0.51 | 0.4 |
| **15** | 0.4 | 0.49 | 0.11 | 0.25 | 0.55 | 0.2 | 0.07 | 0.39 | 0.54 |
| **16** | 0.43 | 0.45 | 0.12 | 0.27 | 0.53 | 0.2 | 0.07 | 0.41 | 0.52 |
| **17** | 0.34 | 0.55 | 0.11 | 0.16 | 0.64 | 0.2 | 0.02 | 0.46 | 0.52 |
| **18** | 0.28 | 0.55 | 0.17 | 0.13 | 0.54 | 0.33 | 0.02 | 0.21 | 0.77 |

Source: adapted from Guo et al. [36]
