# Supplementary material for: Assessing long-term QALYs gain from averting and reversing overweight and obesity in childhood
Source: Springer Nature journal article supplement (doi:10.1007/s11136-016-1285-7), 2016-04-06
Supplement: MOESM3 [file 10682936]

**Appendix 3: Annual mortality probability of Thai population by age group and sex**

| **Age(years)** | **Annual transitional probabilities of death from age X to (X+1)** | |
| --- | --- | --- |
| **Male** | **Female** |
| 35-39 | 0.0040 | 0.0016 |
| 40-44 | 0.0051 | 0.0022 |
| 45-49 | 0.0066 | 0.0030 |
| 50-54 | 0.0089 | 0.0044 |
| 55-59 | 0.0125 | 0.0069 |
| 60-64 | 0.0183 | 0.0113 |
| 65-69 | 0.0272 | 0.0174 |
| 70-74 | 0.0439 | 0.0308 |
| 75-79 | 0.0612 | 0.0443 |
| 80-84 | 0.0822 | 0.0668 |
| 85-89 | 0.1155 | 0.1026 |
| 90-94 | 0.1569 | 0.1490 |
| 95-99 | 0.2103 | 0.2070 |
| 100 | 1.0000 | 1.0000 |

Source: adapted from WHO [41]
