# Supplementary material for: Assessing long-term QALYs gain from averting and reversing overweight and obesity in childhood
Source: Springer Nature journal article supplement (doi:10.1007/s11136-016-1285-7), 2016-04-06
Supplement: MOESM4 [file 10682936]

**Appendix 4: Quality of life and relative risk of death at different BMI category by age**

| **Parameter** | | **BMI** | | | | **Reference** |
| --- | --- | --- | --- | --- | --- | --- |
| **<18.5** | **18.5- <25** | **25- <30** | **≥30** |
| **EQ-5D (mean, SD)** | | 0.81 (0.18) | 0.77 (0.18) | 0.74 (0.18) | 0.70 (0.18) | [13] |
|  |  |  |  |  |  |  |
| **Relative risks of death by age (mean, 95%CI)** | | | | | |  |
|  | 35-59 year | 1.38 (0.82-2.32) | 1 | 0.83 (0.65-1.06) | 1.20 (0.84-1.72) | [9] |
|  | 60-69 year | 2.30 (1.70-3.13) | 1 | 0.95 (0.80-1.13) | 1.13 (0.89-1.42) |
|  | ≥70 year | 1.69 (1.38-2.07) | 1 | 0.91 (0.83-1.17) | 1.03 (0.91-1.17) |
