# Supplementary material for: Assessing long-term QALYs gain from averting and reversing overweight and obesity in childhood
Source: Springer Nature journal article supplement (doi:10.1007/s11136-016-1285-7), 2016-04-06
Supplement: MOESM6 [file 10682936]

**Appendix 6: The expected long-term QALYs of Thai children and adolescents stratified by age and BMI percentile in childhood (1.5% discount)**

| **Starting age  (yr)** | **BMI percentile in childhood** | | | | | |
| --- | --- | --- | --- | --- | --- | --- |
| **Male** | | | **Female** | | |
| *<85th* | *85th-94th* | *≥95th* | *<85th* | *85th-94th* | *≥95th* |
| 3 | 12.489 | 12.462 | 12.424 | 14.238 | 14.188 | 14.077 |
| 4 | 12.681 | 12.668 | 12.628 | 14.488 | 14.424 | 14.279 |
| 5 | 12.807 | 12.752 | 12.585 | 14.667 | 14.574 | 14.330 |
| 6 | 13.020 | 12.993 | 12.895 | 14.903 | 14.805 | 14.457 |
| 7 | 13.223 | 13.153 | 12.880 | 15.099 | 15.000 | 14.704 |
| 8 | 13.457 | 13.429 | 13.314 | 15.327 | 15.212 | 14.855 |
| 9 | 13.638 | 13.595 | 13.404 | 15.550 | 15.414 | 15.004 |
| 10 | 13.894 | 13.805 | 13.503 | 15.817 | 15.683 | 15.224 |
| 11 | 14.096 | 14.037 | 13.855 | 16.055 | 15.882 | 15.344 |
| 12 | 14.316 | 14.224 | 13.913 | 16.304 | 16.158 | 15.712 |
| 13 | 14.493 | 14.384 | 14.004 | 16.534 | 16.336 | 15.734 |
| 14 | 14.768 | 14.675 | 14.321 | 16.831 | 16.627 | 15.978 |
| 15 | 15.016 | 14.871 | 14.313 | 17.089 | 16.908 | 16.282 |
| 16 | 15.250 | 15.120 | 14.587 | 17.360 | 17.130 | 16.375 |
| 17 | 15.526 | 15.378 | 14.834 | 17.535 | 17.263 | 16.513 |
| 18 | 15.684 | 15.410 | 14.647 | 17.864 | 17.645 | 16.922 |
