# Supplementary material for: Assessing long-term QALYs gain from averting and reversing overweight and obesity in childhood
Source: Springer Nature journal article supplement (doi:10.1007/s11136-016-1285-7), 2016-04-06
Supplement: MOESM7 [file 10682936]

**Appendix 7: The expected long-term QALYs of Thai children and adolescents stratified by age and BMI percentile in childhood (3.5% discount)**

| **Starting age  (yr)** | **BMI percentile in childhood** | | | | | |
| --- | --- | --- | --- | --- | --- | --- |
| **Male** | | | **Female** | | |
| *<85th* | *85th-94th* | *≥95th* | *<85th* | *85th-94th* | *≥95th* |
| 3 | 4.778 | 4.765 | 4.745 | 5.323 | 5.302 | 5.256 |
| 4 | 4.950 | 4.943 | 4.923 | 5.524 | 5.498 | 5.437 |
| 5 | 5.099 | 5.075 | 5.008 | 5.702 | 5.665 | 5.567 |
| 6 | 5.286 | 5.272 | 5.228 | 5.907 | 5.865 | 5.726 |
| 7 | 5.472 | 5.437 | 5.324 | 6.102 | 6.059 | 5.937 |
| 8 | 5.681 | 5.664 | 5.610 | 6.315 | 6.265 | 6.117 |
| 9 | 5.866 | 5.841 | 5.754 | 6.534 | 6.473 | 6.299 |
| 10 | 6.096 | 6.053 | 5.921 | 6.776 | 6.716 | 6.520 |
| 11 | 6.306 | 6.273 | 6.185 | 7.011 | 6.931 | 6.700 |
| 12 | 6.530 | 6.485 | 6.343 | 7.261 | 7.189 | 6.989 |
| 13 | 6.739 | 6.683 | 6.510 | 7.507 | 7.410 | 7.143 |
| 14 | 6.999 | 6.947 | 6.783 | 7.796 | 7.693 | 7.397 |
| 15 | 7.255 | 7.179 | 6.924 | 8.070 | 7.973 | 7.681 |
| 16 | 7.517 | 7.445 | 7.194 | 8.354 | 8.234 | 7.884 |
| 17 | 7.793 | 7.709 | 7.454 | 8.601 | 8.456 | 8.111 |
| 18 | 8.028 | 7.888 | 7.533 | 8.937 | 8.817 | 8.470 |
