# Supplementary material for: Assessing long-term QALYs gain from averting and reversing overweight and obesity in childhood
Source: Springer Nature journal article supplement (doi:10.1007/s11136-016-1285-7), 2016-04-06
Supplement: MOESM8 [file 10682936]

**Appendix 8: The expected long-term QALYs of Thai children and adolescents stratified by age and BMI percentile in childhood (5% discount)**

| **Starting age  (yr)** | **BMI percentile in childhood** | | | | | |
| --- | --- | --- | --- | --- | --- | --- |
| **Male** | | | **Female** | | |
| *<85th* | *85th-94th* | *≥95th* | *<85th* | *85th-94th* | *≥95th* |
| 3 | 2.443 | 2.436 | 2.424 | 2.687 | 2.675 | 2.651 |
| 4 | 2.569 | 2.564 | 2.553 | 2.829 | 2.815 | 2.782 |
| 5 | 2.685 | 2.671 | 2.635 | 2.962 | 2.942 | 2.891 |
| 6 | 2.823 | 2.815 | 2.791 | 3.113 | 3.090 | 3.016 |
| 7 | 2.964 | 2.944 | 2.882 | 3.262 | 3.238 | 3.172 |
| 8 | 3.122 | 3.112 | 3.081 | 3.424 | 3.396 | 3.316 |
| 9 | 3.269 | 3.254 | 3.204 | 3.595 | 3.560 | 3.464 |
| 10 | 3.448 | 3.423 | 3.348 | 3.781 | 3.747 | 3.638 |
| 11 | 3.618 | 3.597 | 3.545 | 3.968 | 3.921 | 3.793 |
| 12 | 3.801 | 3.773 | 3.692 | 4.170 | 4.127 | 4.012 |
| 13 | 3.979 | 3.944 | 3.843 | 4.373 | 4.314 | 4.161 |
| 14 | 4.191 | 4.157 | 4.060 | 4.608 | 4.545 | 4.372 |
| 15 | 4.406 | 4.358 | 4.209 | 4.839 | 4.777 | 4.604 |
| 16 | 4.633 | 4.586 | 4.436 | 5.080 | 5.004 | 4.796 |
| 17 | 4.869 | 4.813 | 4.661 | 5.305 | 5.212 | 5.006 |
| 18 | 5.088 | 5.000 | 4.788 | 5.592 | 5.514 | 5.302 |
